# Supplementary material for: Meta-analysis of the safety of voriconazole in definitive, empirical, and prophylactic therapies for invasive fungal infections
Source: Springer Nature journal article supplement (doi:10.1186/s12879-017-2913-8), 2017-12-01
Supplement: MOESM2 [file 15331758]

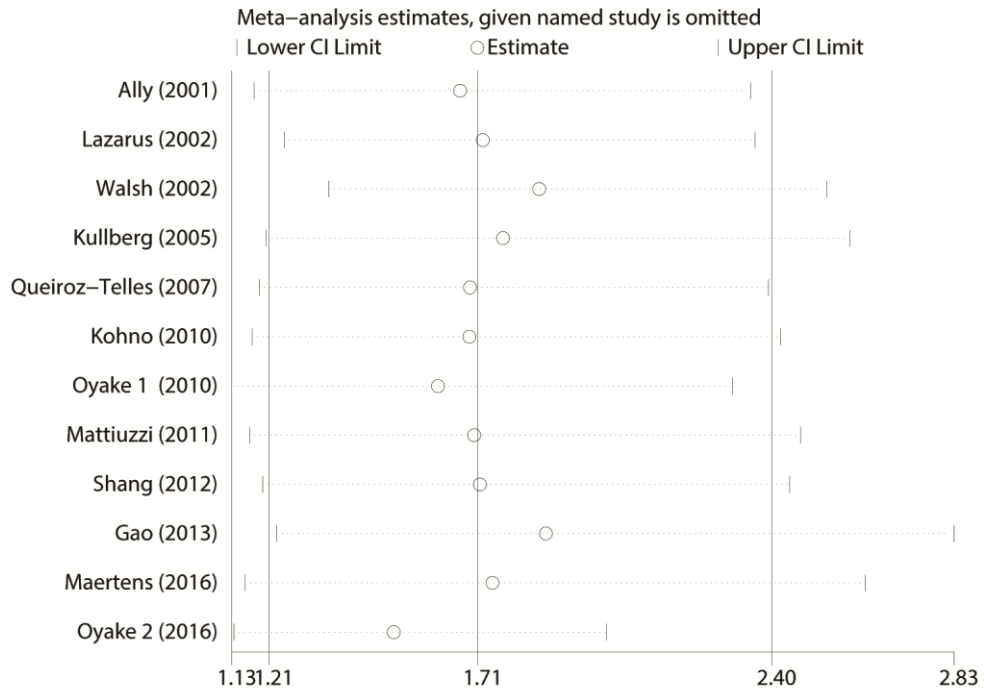

**Figure S1.** Sensitive analysis of individual study involved in the evaluation of tolerability.

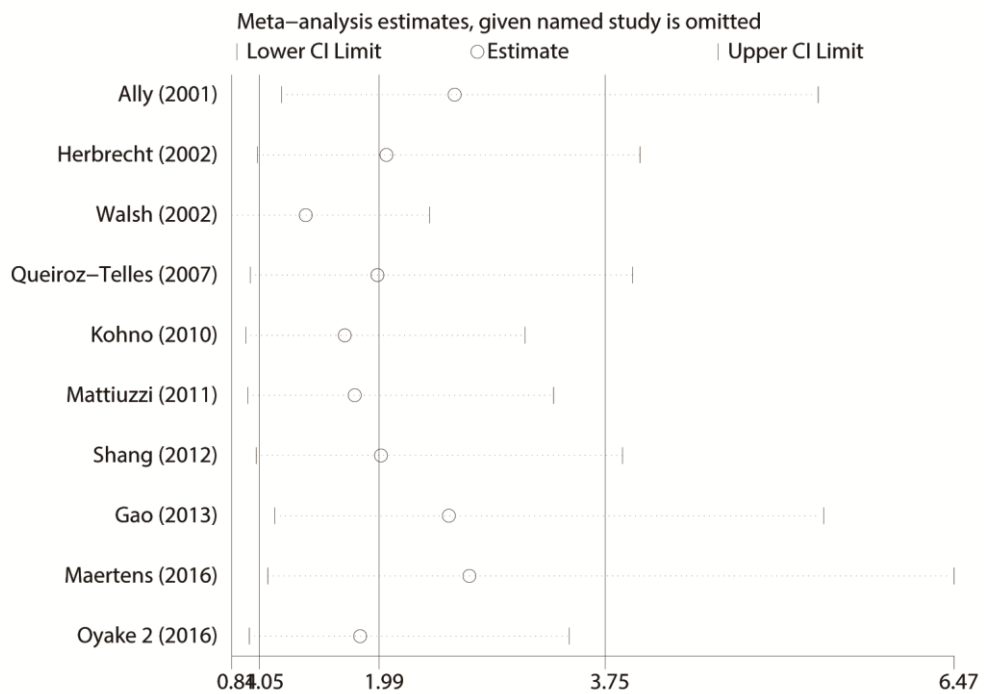

**Figure S2.** Sensitive analysis of individual study involved in the evaluation of tolerability.

neurotoxicity.

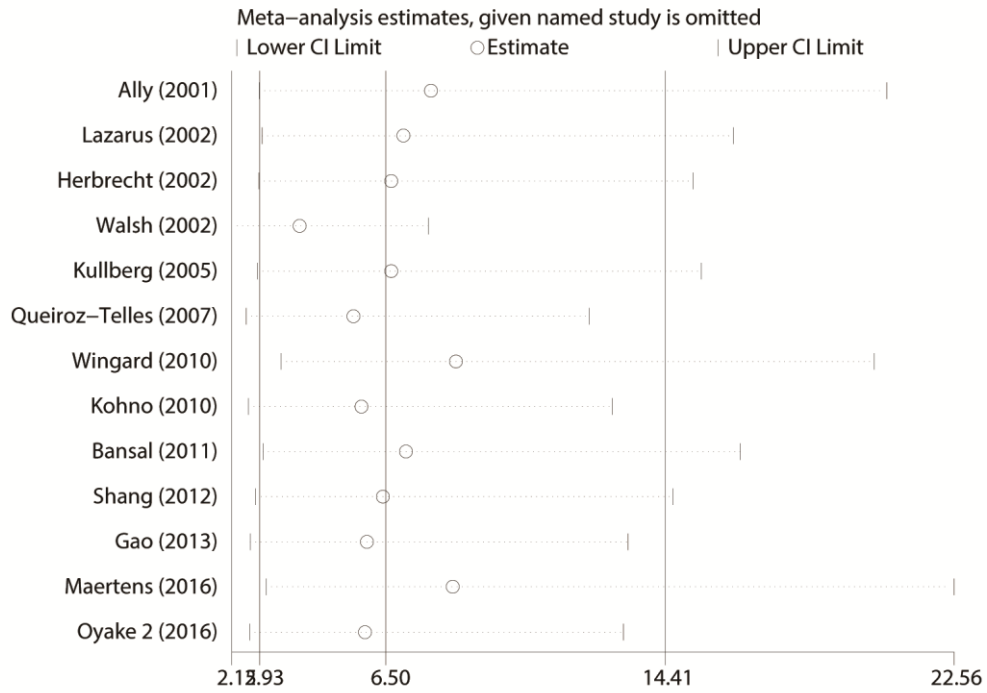

**Figure S3.** Sensitive analysis of individual study involved in the evaluation of visual toxicity.

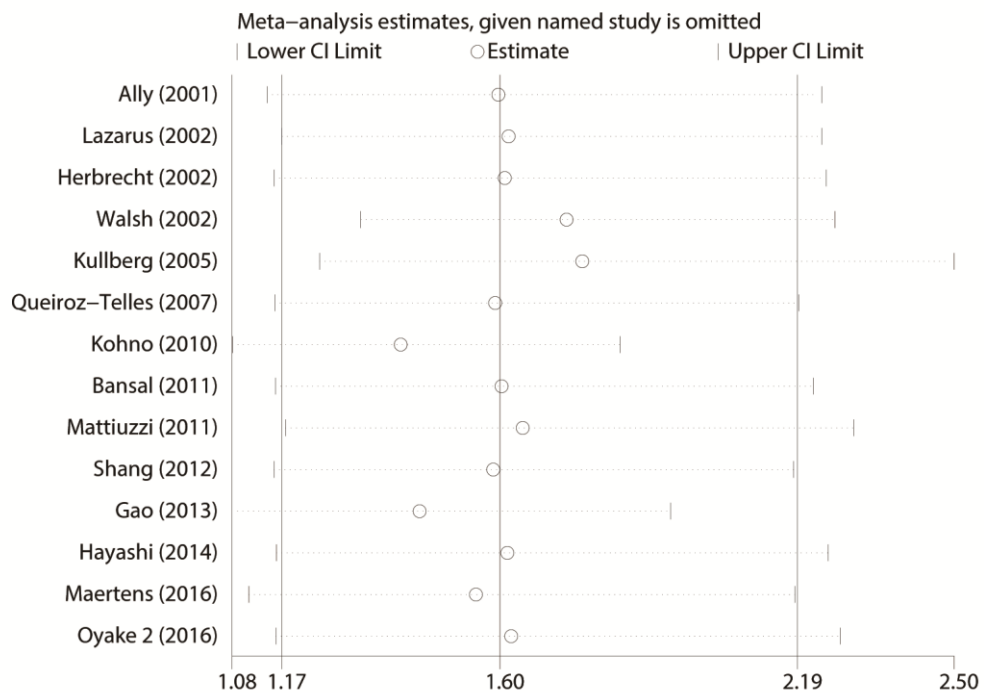

**Figure S4.** Sensitive analysis of individual study involved in the evaluation of hepatotoxicity.

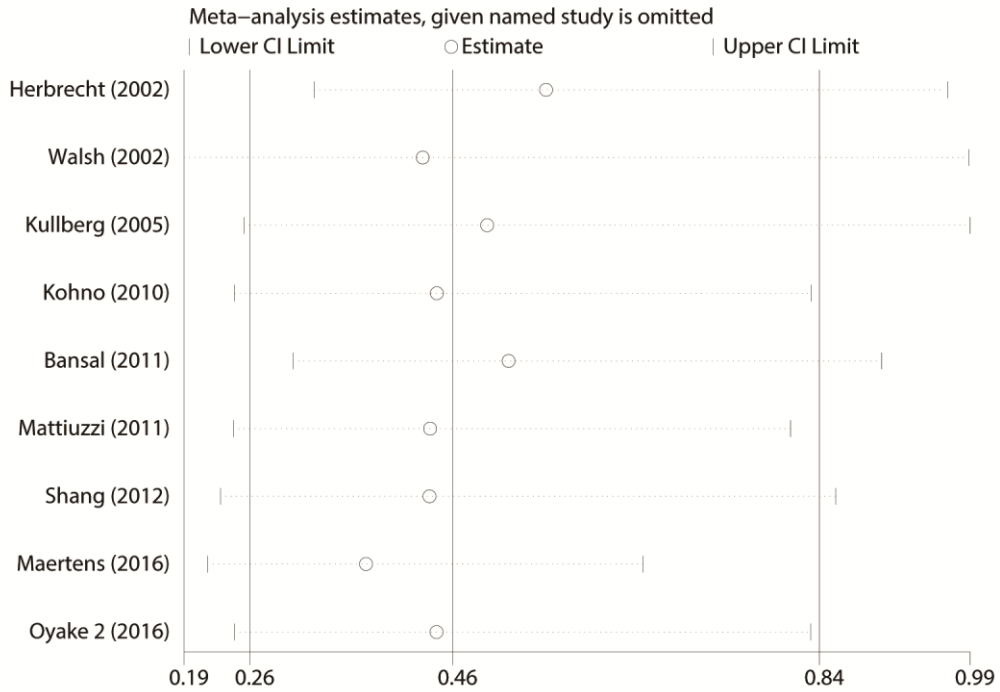

**Figure S5.** Sensitive analysis of individual study involved in the evaluation of nephrotoxicity.
