# Supplementary material for: Meta-analysis of the safety of voriconazole in definitive, empirical, and prophylactic therapies for invasive fungal infections
Source: Springer Nature journal article supplement (doi:10.1186/s12879-017-2913-8), 2017-12-01
Supplement: MOESM3 [file 15331758]

**Table S1.** Summary of sensitive analysis for voriconazole safety

| Outcomes        | Term excluded            | Studies excluded              | I <sup>2</sup> primary | I <sup>2</sup> | OR(95% CI) primary | OR(95% CI)        | P primary | P        |
|-----------------|--------------------------|-------------------------------|------------------------|----------------|--------------------|-------------------|-----------|----------|
| tolerability    | Small sample size (n<50) | Lazarus 2002                  | 32                     | 26             | 1.71 [1.21, 2.40]  | 1.72 [1.25, 2.36] | 0.002     | 0.0009   |
|                 | Single center            | Mattiuzzi 2011                | 32                     | 37             | 1.71 [1.21, 2.40]  | 1.70 [1.17, 2.47] | 0.002     | 0.006    |
|                 | High risk of bias.       | Oyake1 2016<br>Oyake2 2016    | 32                     | 2              | 1.71 [1.21, 2.40]  | 1.39 [1.06, 1.82] | 0.002     | 0.02     |
| neurotoxicity   | Small sample size (n<50) | NO                            | 55                     | 55             | 1.52 [1.15, 1.99]  | 1.52 [1.15, 1.99] | 0.03      | 0.003    |
|                 | Single center            | Bansal 2011                   | 55                     | 53             | 1.52 [1.15, 1.99]  | 1.45 [1.10, 1.91] | 0.03      | 0.008    |
|                 | High risk of bias        | Oyake2 2016                   | 55                     | 55             | 1.52 [1.15, 1.99]  | 1.47 [1.12, 1.94] | 0.03      | 0.006    |
| visual toxicity | Small sample size (n<50) | Lazarus 2002<br>Bansal 2011   | 77                     | 81             | 4.42 [3.42, 5.71]  | 4.47 [3.44, 5.82] | <0.00001  | <0.00001 |
|                 | Single center            | Bansal 2011                   | 77                     | 79             | 4.42 [3.42, 5.71]  | 4.45 [3.43, 5.77] | <0.00001  | <0.00001 |
|                 | High risk of bias        | Bansal 2011<br>Oyake2 2016    | 77                     | 80             | 4.42 [3.42, 5.71]  | 4.28 [3.29, 5.56] | <0.00001  | <0.00001 |
|                 |                          |                               |                        |                |                    |                   |           |          |
| hepatotoxicity  | Small sample size (n<50) | Lazarus 2002<br>Bansal 2011   | 39                     | 48             | 1.60 [1.17, 2.19]  | 1.62 [1.16, 2.27] | 0.003     | 0.005    |
|                 | Single center            | Bansal 2011<br>Mattiuzzi 2011 | 39                     | 48             | 1.60 [1.17, 2.19]  | 1.65 [1.17, 2.34] | 0.003     | 0.005    |
|                 | High risk of bias        | Bansal 2011<br>Hayashi 2014   | 39                     | 52             | 1.60 [1.17, 2.19]  | 1.64 [1.13, 2.38] | 0.003     | 0.009    |
|                 |                          |                               |                        |                |                    |                   |           |          |
| nephrotoxicity  | Small sample size (n<50) | Bansal 2011                   | 67                     | 63             | 0.46 [0.26, 0.84]  | 0.52 [0.30, 0.90] | 0.01      | 0.02     |
|                 | Single center            | Bansal 2011<br>Mattiuzzi 2011 | 67                     | 68             | 0.46 [0.26, 0.84]  | 0.50 [0.28, 0.88] | 0.01      | 0.02     |
|                 | High risk of bias        | Bansal 2011<br>Oyake2 2016    | 67                     | 68             | 0.46 [0.26, 0.84]  | 0.51 [0.29, 0.90] | 0.01      | 0.02     |

NA, not available.
