# Supplementary material for: Meta-analysis of the safety of voriconazole in definitive, empirical, and prophylactic therapies for invasive fungal infections
Source: Springer Nature journal article supplement (doi:10.1186/s12879-017-2913-8), 2017-12-01
Supplement: MOESM4 [file 15331758]

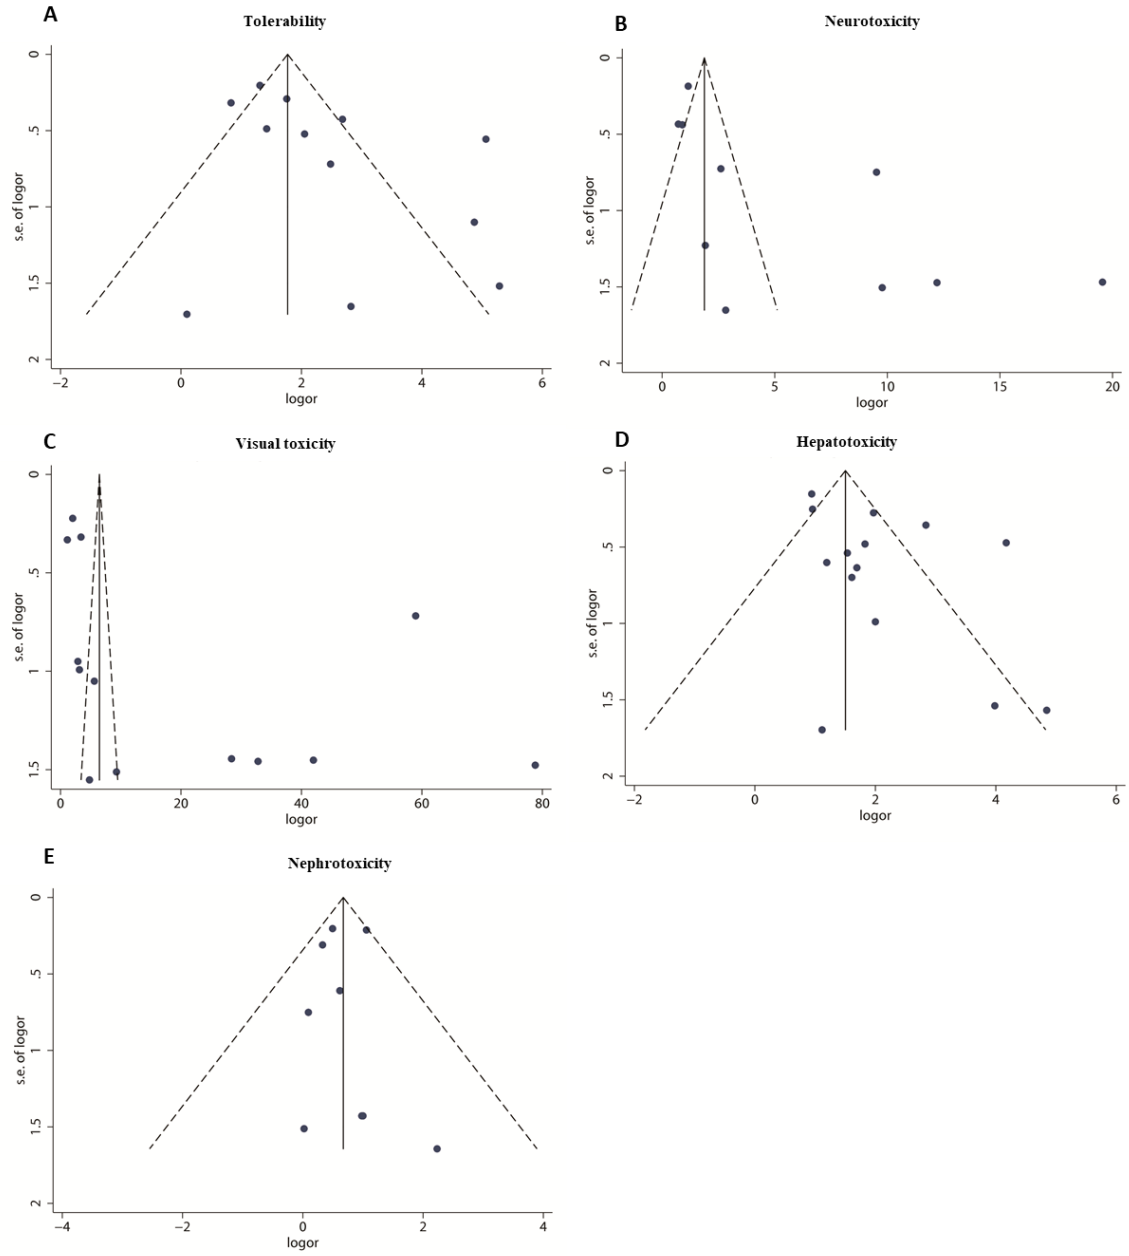

**Figure S6.** Funnel plots for the tolerability (A), neurotoxicity (B), visual toxicity (C), hepatotoxicity (D), and nephrotoxicity (E).
